## 1 Title

# 2 Neuronal extracellular vesicles mediate BDNF-dependent dendritogenesis and 3 synapse maturation via microRNAs

4 Anna Antoniou<sup>1,2\*</sup>, Loic Auderset<sup>1,2</sup>, Lalit Kaurani<sup>3,4</sup>, Andre Fischer<sup>3,4</sup>, Anja Schneider<sup>1,2</sup>

5 <sup>1</sup>Institute for Neurodegenerative Diseases and Geriatric Psychiatry, University Hospital Bonn,  
6 Germany

7 <sup>2</sup>German Center for Neurodegenerative Diseases (DZNE), Bonn, Germany

8 <sup>3</sup>Department of Psychiatry and Psychotherapy, University Medical Center Göttingen, Göttingen,  
9 Germany

10 <sup>4</sup>Department for Systems Medicine and Epigenetics in Neurodegenerative Diseases, German Center  
11 for Neurodegenerative Diseases (DZNE), Göttingen, Germany.

12 \*correspondence should be addressed to AA ([anna.antoniou@dzne.de](mailto:anna.antoniou@dzne.de))

## 13 Abstract

14 Extracellular vesicles (EVs) have emerged as novel regulators of several biological processes,  
15 in part via the transfer of EV content such as microRNA; small non-coding RNAs that regulate  
16 protein production, between cells. However, how neuronal EVs contribute to trans-neuronal  
17 signaling is largely elusive. We examined the role of neuron-derived EVs in neuronal  
18 morphogenesis downstream signaling induced by brain-derived neurotrophic factor (BDNF).  
19 We found that EVs perpetuated BDNF induction of dendrite complexity and synapse  
20 maturation in naïve hippocampal neurons, which was dependent on the activity of three  
21 microRNAs, miR-132-5p, miR-218 and miR-690. These microRNAs were up-regulated in BDNF-  
22 stimulated EVs. Moreover, supplementation with BDNF-EVs rescued the block of BDNF-  
23 induced phenotypes upon inhibition of miRNA activity. Our data therefore suggest a major  
24 role for EVs in BDNF-dependent morphogenesis, and provide new evidence for the functional  
25 transfer of microRNAs between neurons. This is not only an important step towards  
26 understanding the function of EVs in inter-neuronal signaling, but is also relevant for many  
27 disorders characterized by decreased BDNF signaling, such as major depression or cognitive  
28 impairment.

## 29 Introduction

30 Extracellular vesicles (EVs) are lipid membrane-enclosed vesicles that have recently emerged  
31 as important regulators of development, adaptation and homeostasis in several biological

32 systems<sup>1</sup>. In the brain, EVs were shown to mediate communication between neurons and non-  
33 neuronal cells such as oligodendrocytes<sup>2,3</sup>, astrocytes<sup>4,5</sup>, microglia<sup>6-8</sup> and vascular endothelial  
34 cells<sup>9</sup>, and have been implicated in the spreading of misfolded, aggregating proteins such as  
35 tau<sup>10-12</sup>, amyloid-beta<sup>13,14</sup> and alpha-synuclein<sup>15,16</sup> in neurodegenerative disease models. An  
36 increasing number of reports demonstrate a function of EVs in neurobiological processes,  
37 namely neurogenesis<sup>17</sup>, excitatory synapse pruning<sup>18</sup> and inhibitory neurotransmission<sup>19</sup>.  
38 Nevertheless, the precise contribution of EVs in neuronal morphogenesis is still largely elusive.

39 Although small EVs were previously commonly referred to as exosomes, which originate from  
40 the fusion of multi-vesicular endosomes (MVE) with the plasma membrane, it is now  
41 established that most EV preparations are heterogeneous<sup>20,21</sup>. For simplicity, we therefore  
42 classify EVs based on their size rather than biogenesis. Small EVs (sEVs; ~50-200nm) from  
43 many different cell types were shown to contain non-coding RNAs (ncRNAs), such as  
44 microRNAs (miRNAs)<sup>20,22</sup>, which are potent inhibitors of cytoplasmic protein production and  
45 regulators of gene expression<sup>23-25</sup>. Neuronal miRNAs play key roles in neuronal  
46 morphogenesis and are crucial regulators of synaptic plasticity; that is experience dependent  
47 changes in the strength of synapses<sup>25</sup>. Interestingly, evidence of functional miRNA transfer  
48 between cells has previously been reported in brain cells. For instance, neuron-secreted miR-  
49 124 upregulates the glutamate transporter GLT1 in astrocytes<sup>5</sup>, and neuronal EV-miR-132 was  
50 shown to promote vascular integrity by regulating vascular endothelial cadherin in  
51 neuroepithelial cells<sup>9</sup>. Moreover, it was previously reported that EV-miRNAs secreted at the  
52 synaptodendritic compartment are predicted to target regulators of neurite outgrowth<sup>26</sup>, and  
53 miRNAs and other small ncRNAs were shown to be present in synaptic vesicles<sup>27</sup>. These and  
54 other publications in other biological systems<sup>28-30</sup> indicate that miRNA regulatory networks  
55 may extend beyond cellular barriers. Whether neurons communicate via EV-miRNAs is  
56 currently unexplored.

57 We hypothesized that EVs play a role in neuronal morphogenesis within the context of BDNF  
58 signaling. BDNF has important roles in neuronal development, plasticity and  
59 neuromodulation<sup>31</sup>, in part by regulating local translation at neurites<sup>32</sup>, and miRNA production  
60 and activity<sup>33-35</sup>. In turn, several miRNAs were shown to mediate BDNF-dependent processes,  
61 for instance by targeting the actin regulator Limk1<sup>36</sup> and the major regulators of transcription  
62 and translation, CREB<sup>37</sup> and Pumilio<sup>38</sup>, respectively. Our data show that BDNF selectively

63 regulates the sorting of specific miRNAs in sEVs. EVs from BDNF- but not control-stimulated  
64 neurons increased dendrite morphogenesis and induced the clustering of the pre-synaptic  
65 marker synaptophysin at dendrites of naïve hippocampal neurons. We further showed that  
66 these effects were dependent on the synergistic activity of BDNF-regulated EV-miRNAs.  
67 Importantly, defects in BDNF-dependent morphogenesis upon inhibition of these miRNAs was  
68 rescued by EVs from BDNF- but not control-stimulated neurons. Overall, this data  
69 demonstrates a specific role for neuronal EVs in BDNF-dependent dendrite maturation, and is  
70 to our knowledge the first report of functional inter-neuronal miRNA transfer.

## 71 **Materials and Methods**

### 72 **Plasmids**

73 Plasmids for dsRed, membrane GFP (mGFP) and dual fluorescence miRNA sensors were used as  
74 previously described (Antoniou et al 2018). Custom primers were purchased from Sigma and miRNA  
75 probes were from Life Technologies (*Supplementary Methods, Table S1*).

### 76 **Cell Culture**

77 Unless otherwise stated cell culture media solutions were purchased from Invitrogen. Cell lines were  
78 not used after 25 passages and regularly tested for mycoplasma contamination by PCR.

#### 79 *Primary neuronal cell culture*

80 Primary cortical and hippocampal neurons were derived from NMRI mice at embryonic day 16 (E16)  
81 according to Animal Welfare regulations. Pregnant mice were obtained from Charles River  
82 Laboratories (Sulzfeld, Germany). Brain tissue was dissected in HBSS medium supplemented with 1mM  
83 sodium pyruvate, 0.1% glucose and 10mM HEPES (pH7.3) and neurons were dissociated using 0,025%  
84 Trypsin. Neurons were seeded onto cell culture dishes (Falcon) or nitric-acid washed glass coverslips  
85 (Carl Roth GmbH) coated with 0,5mg/ml poly-D-lysine (Sigma) in plating medium (Basal medium  
86 Eagle's containing Eagle's salts, 0.45% glucose, 10% horse serum (Capricorn; HOS-1A), 1mM sodium  
87 pyruvate, 100U/ml Penicillin and 0,1mg/ml Streptomycin. Plating medium was replaced with serum-  
88 free maintenance medium MEM supplemented with 0.6% glucose, 0,2% sodium bicarbonate, 1mM  
89 sodium pyruvate, 2% B27 supplement (Gibco), 2mM Glutamax, 100U/ml Penicillin and 0,1mg/ml  
90 Streptomycin. Neurons were kept in a humidified incubator supplied with 5% CO<sub>2</sub> at 37°C.

#### 91 *Cell Culture Treatments*

92 Recombinant BDNF (Peprotech, #450-02) was dissolved in sterile water containing 0.1% bovine serum  
93 albumin (BSA). Neurons were treated with 50ng/ml BDNF or control vehicle for 20-30 minutes unless  
94 otherwise stated, and washed out 3 times with maintenance medium. Recombinant myc and myc-  
95 BDNF were from Chromotek and Cusabio, respectively. For blocking MAPK activity, neurons were  
96 treated with 10µM U0126 (Merck Millipore) for 30 min before addition of BDNF or control vehicle.  
97 Dynasore (Sigma-Aldrich) was dissolved in DMSO and used at 40µM, 30 min prior to addition of EVs.  
98 GW4869 (Sigma) was used at 5µM. AraC (Sigma) was used at the final concentration of 2µM on 1 DIV  
99 and washed out 24 hours later. Lipofectamine 2000 reagent was used to transfect primary

100 hippocampal neurons and N2A neuroblastoma cells according to manufacturer's instructions.  
101 Transfections were performed at 5 DIV, 1-2 days prior to BDNF or EV treatments.

## 102 **EV isolation and treatments**

103 For all experiments, fresh, serum-free collection medium was added to donor cells 16 hours before EV  
104 isolation. Unless otherwise stated, 5-7DIV primary cortical neurons were used as EV donors and 6-7DIV  
105 hippocampal neurons were EV recipients. For functional experiments, sEV stock concentration was  
106 150ng EV protein / $\mu$ l (EVs from 100,000 donor cells / $\mu$ l). Unless specified, a final concentration of 3 $\mu$ g  
107 EV protein /ml was used.

108 For more information on EV isolation, fluorescent labeling and NTA see *Supplementary Methods*.

## 109 **RNA Isolation**

110 Total RNA was isolated using peqGOLD Trifast (VWR) or miRNeasy micro kit (Qiagen). Genomic DNA  
111 contamination was eliminated using either TURBO DNA-free kit (AM1907) or on-column digestion with  
112 RNase-free DNase set (Qiagen), respectively. RNA concentration was quantified using Nanodrop  
113 spectrophotometer.

## 114 **Real-time quantitative PCR (rt-qPCR)**

115 Reverse transcription was carried out using iScript cDNA synthesis kit (170-8891, Bio-Rad) for mRNA  
116 targets and TaqMan Advanced miRNA cDNA synthesis kit (ThermoFischer; A28007) for miRNAs. PCRs  
117 were performed on StepOnePlus Real-Time PCR system (Applied Biosystems) using either iTaq SYBR  
118 Green Supermix with ROX (Biorad, #172-5121) or TaqMan Fast Advanced Master Mix (ThermoFischer,  
119 #4444557) for TaqMan assays. For NGS validation, miScript II RT kit synthesis was used for cDNA  
120 synthesis and candidate miRNA-specific primers were used in SYBR Green-based PCR.

## 121 **Small RNA sequencing**

122 Twelve small RNA libraries representing 2 biological and 3 technical replicates from control- or BDNF-  
123 treated cortical neurons and corresponding EVs were prepared using NEBNext\_Multiplex Small RNA  
124 Library Prep Set for Illumina (New England Biolabs) as per manufacturer's instructions and sequenced  
125 in Illumina HiSeq2000. An in-house developed pipeline was used to analyze the small RNAome. Quality  
126 check and demultiplexing were performed using the CASAVA 1.8.2 software (Illumina). To quantify  
127 small RNAome, reads were first mapped to mature miRNA sequences obtained by miRBase  
128 (<http://www.mirbase.org/>) followed by further mapping to other small non coding RNA sequences  
129 (<http://www.ensembl.org/info/data/ftp/index.html>). Reads were then mapped to the mm10  
130 reference genome. Target prediction and gene set enrichment analysis was performed using miRWalk  
131 (<https://www.mirwalk.umh.uni-heidelberg.de/>).

## 132 **Immunofluorescence**

133 Neurons were fixed in 4% paraformaldehyde/ 4% sucrose/ 1x phosphate buffered saline (PBS) solution  
134 for 15-20min at room temperature. For immunocytochemistry experiments, cells were permeabilized  
135 in 0.1% Triton-X100 for 5 min, washed in PBS and immunostained with primary and secondary  
136 antibodies diluted in 2% Bovine Serum Albumin (BSA) / 0.1% Tween-20 / 1xPBS. To image EVs in  
137 recipient cells, permeabilization was performed using 0.25% Saponin/ 5% BSA/ PBS for 30 min at room  
138 temperature, and the same solution was used for primary and secondary antibody incubation. Primary  
139 antibodies were added onto glass coverslips for either 1 hour at room temperature or overnight at 4°C,  
140 and secondary antibodies were incubated for 45-60 min at room temperature in a light-protected,  
141 humidified chamber. Coverslips were mounted on imaging slides using Mowiol 4-88 solution

142 containing DABCO (24mg/ml) and DAPI (1:10,000). Images were acquired on Zeiss LSM880 confocal  
143 microscope (DZNE LMF).

#### 144 **Quantification of dendrite complexity**

145 XY scans of dsRed-expressing neurons were acquired using a 20x objective and dendrite complexity  
146 was quantified using Sholl analysis. Concentric circles were placed around the neuronal soma at 15 $\mu$ m  
147 intervals (end radius of 190 $\mu$ m), and the number of intersections between the circles and neuronal  
148 dendrites was counted in thresholded images using the Sholl analysis plugin in Image J. The number of  
149 intersections was quantified for approximately 10 neurons per condition and averaged for each  
150 independent experiment.

#### 151 **Dual-fluorescence sensor assay**

152 N2a cells were co-transfected with sensor plasmids and 10nM LNAs and EVs were added 24 hours  
153 later. Cells were fixed after approximately 22-24 hours. XY images were acquired using a 20x objective  
154 with picture tiling on two regions of interest (ROI). Sensor repression was quantified by randomly  
155 selecting 50-60 GFP-expressing cells and calculating the proportion of cells co-expressing dsRed. GFP  
156 cells were selected blindly, prior to red channel visualization.

#### 157 **Synapse quantification**

158 XY images of dsRed-expressing neurons were acquired at optimal resolution settings using a 63x  
159 objective. For quantification of pre- and post-synaptic marker levels, mean intensity was calculated at  
160 20x8 $\mu$ m ROIs placed at random on primary and secondary dendrites of similar thickness. Colocalization  
161 analysis was performed using thresholded ROIs in the Coloc2 plugin in Image J. For puncta analysis,  
162 PSD95- and SYP-positive puncta were counted in dendritic spines using dsRed as a morphological  
163 marker. Only clearly defined puncta at the tip of dendritic spines were included in analysis. For  
164 statistical analysis, the average of 10 neurons and 2-3 dendrites per neuron was calculated for each  
165 experimental trial.

#### 166 **Quantification and data analysis**

167 Data are represented as mean  $\pm$  standard deviation, unless otherwise stated. Statistical significance  
168 tests were performed as indicated in the figure legends using GraphPad Prism software. All imaging  
169 experiments were performed in a blinded manner.

## 170 **Results**

### 171 **BDNF does not affect EV yield**

172 We first characterized EVs secreted from primary mouse embryonic cortical neurons at 5-6  
173 days in vitro (DIV). To exclude EVs secreted at earlier time points, conditioned maintenance  
174 media was washed out and replaced with fresh culture media 16 hours prior to EV isolation.  
175 Cell culture supernatants were then subjected to differential centrifugation to clear debris  
176 (3,500xg) and large vesicles (4,500xg) and to isolate medium-sized EVs (mEV; 10,000 xg) and  
177 sEVs (100,000 xg) (**Fig. 1A**). Using nanoparticle tracking analysis (NTA) we quantified the size  
178 distribution of re-suspended sEV and mEV pellets, which peaked at 168.5  $\pm$  5.6nm and 196.6

179  $\pm 8.7\text{nm}$  in size, respectively, with mean particle concentrations of  $3.66\text{e}8 \pm 9\text{e}7$  and  $2.17\text{e}8 \pm$   
180  $6.22\text{e}7$  particles/ml, respectively (**Fig. 1B**). The size distribution of particles derived from  
181 cleared 3,500 *xg* supernatants peaked at  $159.1 \pm 4.1\text{nm}$  (**Fig. 1C**), suggesting that the majority  
182 of extracellular particles are indeed small in size. Importantly, non-conditioned cell culture  
183 medium processed in parallel had negligible particle counts in NTA, confirming that the  
184 medium itself does not account for isolated EVs (**Fig. 1C**). Moreover, inhibition of exosome  
185 secretion by the neutral sphingomyelinase (N-SMase) inhibitor GW4869 decreased particle  
186 concentration by approximately 1.5-fold in both sEVs and cleared supernatants and did not  
187 affect the mEV fraction (**Fig. S1A-B**). We further validated the size of sEV preparations using  
188 scanning transmission electron microscopy (STEM), which had a mean size of  $150.5 \pm 13.5\text{nm}$   
189 under control conditions (**Fig. 1D, S1D**). Furthermore, we confirmed the purity of EV fractions  
190 in western blot (**Fig. 1E**). Here, we observed the presence of luminal endosomal proteins Alix,  
191 TSG101 and Flotilin-2 and the transmembrane protein Lamp1 in sEV fractions, which did not  
192 contain the Golgi marker, Grp75, or the endoplasmic reticulum protein Calnexin. We did not  
193 observe strong signals of EV proteins in mEV fractions, likely due to the lower yield of mEVs as  
194 shown by NTA measurements (**Fig. 1B**). Even though embryonic neuronal cultures grown in  
195 the absence of serum should not contain a significant amount of glia cells, contamination with  
196 glia-derived sEVs could lead to misinterpretation of our data. We therefore examined whether  
197 depletion of mitotic cells from neuronal cultures using cytosine d-D-arabinofuranoside (AraC)  
198 affects sEV yield. To validate glia cell depletion, we immunostained primary cortical neurons  
199 with antibodies against the neuronal marker MAP2 and the astrocyte-specific marker GFAP,  
200 which revealed that the vast majority of cells are in fact neuronal (**Fig. S1H**). Moreover,  
201 treatment of neuronal cultures with AraC, depleted GFAP signals and had no effect on the  
202 yield or size distribution of sEVs quantified by NTA (**Fig. 1G**). As AraC affects the long-term  
203 viability of neuronal cultures, which may itself influence the neuronal secretome, we did not  
204 use it in subsequent experiments.

205 Following characterization of neuron-derived EVs, we then examined whether BDNF  
206 treatment affects EV secretion. BDNF did not change the size distribution or mean particle  
207 concentration of pre-cleared supernatants as measured in NTA (**Fig. 1C, S1C**). Moreover, we  
208 did not observe any significant changes in the size or distribution of sEVs isolated from control  
209 (Ctrl) or BDNF-treated cortical neurons using STEM (**Fig. 1D, S1D-E**). Furthermore, BDNF  
210 treatment did not affect the relative abundance of TSG101 and Flotilin-2 (**Fig. 1E, S1F**), or the

211 total protein and RNA concentration in cell lysates (CL) and sEVs (**Fig. 1F, S1G**). Overall, this  
212 data demonstrates that the majority of neuronal extracellular particles are small in size and  
213 that BDNF does not affect EV secretion.

#### 214 **BDNF- but not control-stimulated sEVs increase dendrite complexity**

215 BDNF is a well-known regulator of neuronal dendrite development, which is particularly  
216 important in the hippocampus<sup>39–41</sup>. To investigate whether sEVs participate in BDNF-  
217 dependent processes we first examined the effect of sEVs on dendrite complexity. Here, we  
218 incubated sEVs derived from Ctrl- or BDNF-treated cortical neurons (hereafter referred to Ctrl-  
219 EV and BDNF-EV, respectively) with hippocampal neurons at 6-7 DIV and quantified dendrite  
220 complexity three days later using Sholl analysis. Interestingly, BDNF-EVs but not Ctrl-EVs,  
221 increased dendrite complexity similarly to BDNF treatment (**Fig. 2A-C, S2A**). This effect was  
222 not dose-dependent, as BDNF-EVs supplied at three times the concentration had similar fold  
223 changes in complexity. Moreover, BDNF-fold changes tended to be larger and more significant  
224 in EV versus non-EV conditions, when compared to their control counterparts; Ctrl-EV or  
225 control vehicle respectively (**Fig. 2C**). To confirm that this phenotype was not mediated by  
226 residual amounts of exogenous BDNF in purified sEVs, we treated donor neurons with either  
227 recombinant BDNF, myc, or myc-BDNF and processed sEVs and CL in western blot. Neither  
228 endogenous mature BDNF, nor exogenous myc-BDNF could be detected using antibodies  
229 against BDNF or myc in sEV fractions (**Fig. S2B**). In agreement with this result, unlike BDNF  
230 treatment, incubation of BDNF-EVs with hippocampal neurons for either 20 or 60min did not  
231 lead to the phosphorylation of the BDNF receptor TrkB and did not activate downstream  
232 kinases ERK and AKT (**Fig. 2D-G, S2C**). Moreover, neither ERK phosphorylation nor mature  
233 BDNF expression could be detected after 3 hours of incubation with BDNF-EVs (**Fig. 2H, S2D-**  
234 **E**). Furthermore, BDNF-EVs did not induce TrkB-dependent transcriptional induction of Arc  
235 mRNA<sup>42</sup> for up to 48 hours of treatment (**Fig. S2F**). Therefore, BDNF-EVs promote dendrite  
236 complexity in naïve hippocampal neurons in a mechanism that is distinct from BDNF-TrkB  
237 signaling.

#### 238 **BDNF promotes the sorting of neuronal growth-related miRNAs in sEVs**

239 Previous publications have demonstrated the functional delivery of miRNAs between cells in  
240 several biological contexts<sup>5,8,26,28,29</sup>. As BDNF regulates miRNA biogenesis<sup>33,34,38</sup>, we were  
241 prompted to investigate whether BDNF also regulates the sorting of miRNAs into EVs. To this

242 end, we isolated CL and corresponding sEVs from Ctrl- and BDNF-treated cortical neurons and  
243 performed next generation small RNA sequencing (NGS). Principle component analysis (PCA)  
244 revealed differential clustering of Ctrl and BDNF treated samples in both CL and sEVs (**Fig.**  
245 **S3A**). Interestingly however, BDNF-induced changes in individual miRNAs were not correlated  
246 between CL and sEVs (**Fig. 3A-B**). Among the most significantly changing sEV miRNAs miR-690,  
247 miR-218-5p and miR-351-5p are only regulated in sEVs, miR-132-5p is up-regulated by BDNF  
248 in both compartments and miR-129-2-3p is down-regulated in sEVs and up-regulated in CL  
249 (**Fig. 3B, S3B**, see also **Table S1** in *Supplementary Data*). Importantly, highly expressed sEV  
250 miRNAs, miR-132-5p, miR-218-5p, miR-690 and miR-181a-5p were largely absent from non-  
251 conditioned cell culture media (**Fig. S3D**) and with the exception of miR-690, were depleted  
252 from sEVs following inhibition of exosome secretion by GW4869 (**Fig. 3C**). Using independent  
253 qPCR experiments we further validated the BDNF-dependent up-regulation of miR-132-5p,  
254 miR-218-5p and miR-690 in sEVs, which was blocked by the specific ERK inhibitor U0126 (**Fig.**  
255 **3D-F**). Importantly, neither BDNF nor U0126 treatment changed the concentration or size  
256 distribution of purified sEVs (**Fig. S3D-E**). To verify that BDNF changes sEV-associated miRNAs  
257 and not miRNAs present in the extracellular medium, we purified sEVs using size-exclusion  
258 chromatography and assessed miRNA abundance in pooled fractions enriched in either small  
259 EVs or proteins (fraction number 7-14 and 15-22 respectively). Although both fractions  
260 contained miRNAs, BDNF-induced up-regulation of miR-132-5p, miR-218-5p and miR-690 was  
261 only evident in sEV containing fractions (**Fig. 3G**). Overall, this data suggest that BDNF  
262 regulates the specific sorting of miRNAs in neuronal sEVs such as exosomes, that does not  
263 simply represent changes in intracellular miRNA abundance.

264 To examine the potential function of BDNF-regulated EV-miRNAs, we performed gene  
265 ontology (GO) analysis of predicted gene targets of EV-miRNAs that passed statistical  
266 significance ( $p < 0.05$ ) following multiple comparisons in NGS data analysis; these are miR-132-  
267 5p, miR-218-5p and miR-690 (**Table S1** in *Supplementary Data*). Target prediction revealed  
268 many overlapping targets for these miRNAs, with 63 targets common to all three miRNAs, and  
269 at least 82 targets common to any two miRNAs (**Fig. 3H**). Using target mining and gene set  
270 enrichment analysis of common targets, we observed the enrichment of genes involved in  
271 nervous system development (GO term: *Biological Pathway; BP*) and localized at synaptic  
272 compartments (GO term: *Cellular Component; CC*) (**Fig. 3I**). Moreover, we observed significant  
273 enrichment of genes implicated in transcriptional regulation of gene expression (GO term:



274 *Molecular Function; MF*) (**Fig. 3I**). Therefore, the combined activity of these miRNAs in  
275 recipient neurons may potentially have a drastic effect in neuronal physiology that could  
276 underlie the observed growth-promoting phenotype of BDNF-EVs.

### 277 **EVs and EV-associated miRNAs are taken up by neurons**

278 We next assessed whether EVs are taken up by neurons using the membrane binding dye  
279 lipilight (previously known as membright<sup>43</sup>) to fluorescently label sEVs in confocal microscopy.  
280 This dye exhibits high signal to noise ratio due to quenching by self-aggregation, and was  
281 previously verified in small EV labeling *in vivo*<sup>44</sup>. Indeed, our control experiments using non-  
282 conditioned cell culture media ('No cell control') showed negligible fluorescent signal in  
283 recipient neurons, when compared to lipilight-labeled sEVs (**Fig. 4A**), confirming that potential  
284 dye aggregates do not account for observed fluorescence signals in recipient neurons. Using  
285 immunocytochemistry, we observed the localization of lipilight-labelled Ctrl-EV and BDNF-EV  
286 in somatodendritic regions of MAP2-positive recipient hippocampal neurons (**Fig. S4A**).  
287 Moreover, the neuronal uptake of both Ctrl- and BDNF-EVs at neuronal somatodendritic  
288 compartments was completely blocked following application of the selective dynamin  
289 inhibitor dynasore (**Fig. 4B-C**), suggesting that the vast majority of neuronal sEVs are taken up  
290 via dynamin-dependent endocytosis. Consistently, using super-resolution confocal  
291 microscopy, we observed partial colocalization between lipilight-EVs and the late endosomal  
292 marker Lamp1, whereby lipilight fluorescence intensity was highest on the luminal side of  
293 Lamp1-enclosed vesicles at the neuronal soma (**Fig. S4B**). This is in line with previous reports  
294 suggesting that EVs may release their contents at late endosomal compartments<sup>45,46</sup>.

295 We next examined whether our candidate miRNAs can be functional in recipient cells, using a  
296 dual fluorescence sensor plasmid for miRNA activity that consists of reporter dsRed and  
297 control GFP coding sequences downstream two separate promoters<sup>34</sup>. As N2a cell-derived EVs  
298 contain high levels of miR-218, we designed a sensor containing two miR-218-5p binding sites  
299 at the 3' untranslated region (UTR) of dsRed (**Fig. S4C**). Following 20 hours of incubation, N2a  
300 cell-derived sEVs decreased the number of dsRed-expressing recipient cells transfected with  
301 the miR-218 sensor, but not control plasmid (**Fig. 4D**), suggesting that miR-218 binding is  
302 necessary for EV-mediated translational repression. Although repression of the miR-218  
303 sensor was observed in recipient cells in the absence of sEVs, supplementation of sEVs  
304 significantly increased repression by approximately 2-fold (216.5 +/- 25.9 %). To further verify

305 that this effect is dependent on sEV-miR-218, we transfected recipient cells with anti-sense  
306 locked nucleic acids (LNAs) to inhibit intracellular miR-218, and supplemented N2a cells with  
307 EVs 24 hours later. As expected, anti-miR-218 but not control LNAs increased the basal  
308 expression of dsRed in miR-218 sensor but not control sensor-expressing cells (**Fig. 4E, S4D**).  
309 This was partially rescued by sEV supplementation, which significantly decreased the number  
310 of dsRed expressing cells compared to no-EV controls (**Fig. 4E-F**). Taken together, these results  
311 demonstrate that EV-miR-218 is functional in recipient cells, and can partially rescue inhibition  
312 of intracellular miR-218 activity.

### 313 **BDNF-regulated EV miRNAs mediate dendritogenesis**

314 To investigate whether EV miRNAs mediate the effects of BDNF-EVs on dendrite complexity,  
315 we first examined whether intracellular inhibition of BDNF-regulated EV-miRNAs, miR-218-5p,  
316 miR-132-5p and miR-690, blocks BDNF-dependent dendritogenesis. Hippocampal neurons  
317 were transfected with dsRed and either control LNA or LNA anti-sense to candidate miRNAs,  
318 after which neurons were treated with BDNF and imaged three days later (**Fig. 5A**). Dendrite  
319 complexity was assessed using Sholl analysis and fold changes in BDNF-mediated  
320 dendritogenesis were compared between each condition in neurons expressing either miR-  
321 218 or miR-132, or combinations of two or all three candidate miRNAs. We observed that  
322 inhibition of individual miRNAs did not significantly affect BDNF-induced changes in dendrite  
323 complexity, whereas simultaneous targeting of miR-132 and miR-218 completely blocked  
324 BDNF-induced dendritogenesis (**Fig. 5B, S5A-F**). Moreover, even though the total LNA  
325 concentration was the same for each condition (30nM), inhibition of all three miRNAs; miR-  
326 132, miR-218 and miR-690, most potently blocked BDNF-mediated dendritogenesis compared  
327 to control LNA (**Fig. 5B, S5A&D-F**). Furthermore, BDNF-EV supplementation of neurons  
328 expressing LNAs against all three miRNAs, blocked the LNA-induced decrease in BDNF-  
329 mediated induction of dendrite complexity (**Fig. 5C-E**). This is consistent with a role for EVs in  
330 mediating BDNF-induced dendritogenesis via the delivery of miR-132, miR-218 and miR-690.

### 331 **BDNF-EVs up-regulate synaptophysin clustering at dendrites**

332 Our experiments suggest that BDNF-EVs promote dendrite complexity at a developmental  
333 time point corresponding to dendritic spine and synapse formation. We therefore examined  
334 whether BDNF-EVs may also influence synapse maturation. First, hippocampal neurons were  
335 treated with Ctrl- or BDNF-EVs and immunostained at 9-10DIV with antibodies against the

336 excitatory post-synaptic marker PSD95 and the pre-synaptic marker synaptophysin (SYP) (**Fig.**  
337 **6A**). Co-localization analysis of dendritic segments revealed a small but significant increase in  
338 the overlap between PSD95 and SYP in BDNF-EV compared to Ctrl-EV treated neurons (**Fig.**  
339 **6B, S6A**), suggesting increased synapse formation. Further analysis indicated an increase in  
340 the relative intensity of SYP, but not PSD95 upon BDNF-EV treatment (**Fig. S6B**). Interestingly,  
341 this was not the case when EV donor neurons were treated with GW4869 (**Fig. 6C-D**),  
342 suggesting that exosomes are necessary for this phenotype. As SYP is a general pre-synaptic  
343 marker, we further examined whether BDNF-EVs may also affect the density of inhibitory  
344 synapses using antibodies against the post-synaptic marker Gephyrin and the pre-synaptic  
345 vesicular GABA transporter (vGAT). Here, we observed a small but significant decrease in the  
346 intensity of Gephyrin, but not vGAT at neuronal dendrites treated with BDNF-EVs compared  
347 to Ctrl-EVs (**Fig. 6E, S6C**). Overall this data suggest that BDNF-EVs may promote the maturation  
348 of excitatory synapses by inducing SYP clustering at dendrites.

#### 349 **BDNF-EVs induce synapse maturation via miRNA-218/-132/-690**

350 We next examined whether BDNF-regulated EV-miRNA candidates are implicated in BDNF-  
351 dependent synapse maturation. Hippocampal neurons were transfected with Ctrl LNA or LNAs  
352 against the three up-regulated miRNAs; miR-218-5p, miR-132-5p and miR-690 as previously,  
353 and neurons were fixed and immunostained with PSD95 and SYP antibodies (**Fig. 7A**). Using  
354 dsRed as a morphological marker, we first examined whether dendritic spine density was  
355 affected in these conditions. Neither BDNF nor LNA-mediated inhibition of candidate miRNAs  
356 changed the number of spines along 20 $\mu$ m dendrites (**Fig. 7B, S6D**). We then counted the  
357 number of spines that contain PSD95 and/or are adjacent to SYP puncta. BDNF treatment  
358 alone selectively increased the number and intensity of SYP puncta opposing dendritic spines,  
359 which was not the case for PSD95 (**Fig. 7A, C, S6E**). Nevertheless, BDNF increased the total  
360 number of spines containing PSD95 that are adjacent to SYP suggesting that increased SYP  
361 clustering at dendrites corresponds to increased synapse formation (**Fig. 7A, D**). These effects  
362 were completely blocked by LNA-induced inhibition of BDNF-EV-regulated miRNAs (**Fig 7A, C-**  
363 **D, S6E**). Furthermore, supplementation with BDNF-EVs but not Ctrl-EVs rescued the LNA-  
364 induced decrease in SYP clustering without affecting mean PSD95 intensity (**Fig. 7E-F**) or spine  
365 density (**Fig. 6G**). Therefore, this data shows that BDNF-EVs mediate synapse maturation via  
366 BDNF-regulated miRNAs.

## 367 Discussion

368 We investigated the function of neuronal sEVs within the context of a well-established  
369 paradigm of neuronal morphogenesis downstream BDNF signaling. BDNF selectively regulated  
370 the sorting of growth-related miRNAs in neuronal sEVs, the majority of which did not change  
371 in cell lysates. EVs from BDNF- but not control-treated neurons induced dendrite complexity  
372 and synapse maturation in naïve hippocampal dendrites, similarly to BDNF treatment itself.  
373 Remarkably, this was not due to the activation of BDNF-TrkB signaling cascades or associated  
374 changes in transcriptional regulation. Rather, three miRNAs that were significantly up-  
375 regulated in sEV fractions, miR-132, miR-218 and miR-690, mediated the observed BDNF-EV-  
376 induced phenotypes. Therefore, our study uncovers a novel mechanism of neuronal dendrite  
377 maturation downstream BDNF and provides primary evidence of functional miRNA transfer  
378 between neurons via sEVs.

379 Several studies have now shown that EVs are heterogeneous, with sEV preparations likely  
380 consisting of many different EV sub-types<sup>20,21</sup>. As efficient separation of these sub-types is not  
381 possible so far, we refrain from further classifying sEVs in this study. Nevertheless, we  
382 observed an approximate 1.5-fold reduction of particles in sEV fractions following treatment  
383 of donor neurons with the N-SMase inhibitor GW4869, which is necessary for ESCRT-  
384 independent biogenesis of intra-luminal vesicles in MVEs destined to be secreted as  
385 exosomes<sup>47</sup>. Additionally, we observed the depletion of several miRNAs in sEVs derived from  
386 GW4869-treated neurons, and GW4869 treatment of EV donors abolished the BDNF-EV-  
387 dependent increase in SYP clustering. Notably, miR-690, which was regulated at vesicle  
388 fractions isolated by size-exclusion chromatography, was not depleted by GW4869, suggesting  
389 that both exosomes and non-exosomal vesicles are likely to contribute to BDNF-EV  
390 phenotypes.

391 Despite several examples of functional miRNA transfer between cells<sup>5,8,9,28,29</sup>, there is still  
392 some controversy regarding the presence of EV miRNAs at sufficient concentrations<sup>48</sup>, and the  
393 efficiency of EV uptake by the recipient cells<sup>46</sup>. Admittedly however, these studies do not  
394 exclude the possibility that these processes may become more favorable under specific  
395 conditions, for instance based on the type and state of donor and recipient cells. Our results  
396 using the single cell reporter for miRNA activity indeed demonstrate that EV miR-218 is  
397 functional and administration of EVs largely rescues decreased reporter repression following

398 inhibition of intracellular miR-218 in recipient N2A cells. Moreover, we show that the co-  
399 targeting of at least two EV-miRNAs is necessary for a complete block in BDNF-EV phenotypes.  
400 As these miRNA candidates share many common targets, which are predicted to be involved  
401 in neurodevelopmental processes, a co-targeting mechanism may provide a competitive  
402 advantage for EV-miRNA-mediated translational repression. In this scenario, binding of  
403 multiple miRNA-induced silencing complexes (miRISC) to a 3'UTR would have a stronger effect  
404 on translational repression, presumably via more efficient recruitment of associated factors  
405 involved in the silencing or degradation of the target mRNA. This effect was recently  
406 demonstrated experimentally for co-targeting of several neuronal transcripts by two or more  
407 miRNAs<sup>49</sup>, and is also supported by studies showing that specific groups of miRNAs are  
408 necessary for a biological response such as neuronal differentiation<sup>50,51</sup>.

409 Notably, miRNAs that were up-regulated in BDNF-EVs were previously implicated in BDNF-  
410 related neuronal processes. For instance, miR-132-5p is part of the miR-132/-212 gene cluster  
411 that is transcriptionally induced by BDNF<sup>35</sup>. Deletion or overexpression of these miRNAs led to  
412 defects in memory and hippocampal plasticity. Although most publications define a function  
413 for miR-132-3p, which has a different set of targets than miR-132-5p, so far the relative  
414 contribution of each mature miRNA from this cluster is unclear<sup>52</sup>. Interestingly, we could only  
415 validate the regulation of miR-132-5p in BDNF-EVs, whereas other members of the cluster  
416 were not affected. It is therefore intriguing to speculate that miR-132-5p is selectively sorted  
417 in EVs via an undefined mechanism, which could explain the reported low amounts in cells.  
418 The two other miRNAs miR-218-5p and miR-690, were selectively up-regulated in sEVs and  
419 not CL, and were the only arms that were detectable by NGS in either compartment. In line  
420 with a role in BDNF-dependent processes suggested by our results, miR-218 is enriched in  
421 neurites and was previously shown to promote increased synaptic strength<sup>53</sup>, as well as  
422 resistance to stress-induced depressive behaviors<sup>54</sup>. The latter was positively correlated to  
423 peripheral miR-218 levels. Although a potential role for EVs was not addressed in this study,  
424 EVs from the brain are found in the blood and cerebrospinal fluid, and EV-miRNAs are a  
425 promising source of biomarkers of cognitive decline and early prognosis of diseases like  
426 Alzheimer's disease<sup>55,56</sup>.

427 Interestingly, whereas BDNF signaling itself is thought to be highly localized to sites of BDNF  
428 secretion, reportedly only up to 4-5 microns<sup>61</sup>, several examples have demonstrated that EVs

429 are capable of traveling long distances, for instance crossing tissue barriers such as the  
430 placenta<sup>57</sup> and the blood brain barrier<sup>58</sup>, and across synapses<sup>10,59,60</sup>. Moreover, we previously  
431 suggested the localized regulation of miRNA production by BDNF via the dynamic anchoring  
432 of the miRNA production machinery at membranes of dendritic organelles<sup>34</sup>. Although further  
433 work is needed to elucidate the precise mechanisms of EV-miRNA sorting, secretion and  
434 potential spreading, localized BDNF-EV secretion may occur within the vicinity of TrkB  
435 activation sites. This may be important for regulating the morphology of neighboring or inter-  
436 connected neurons and potentially prime synapses for subsequent responses to increased  
437 neuronal activity. Given the wide-spread role of BDNF signaling in hippocampal plasticity, EVs  
438 may thus contribute to neurobiological processes underlying learning and memory.

## 439 References

- 440 1. van Niel, G., D'Angelo, G. & Raposo, G. Shedding light on the cell biology of extracellular  
441 vesicles. *Nat. Rev. Mol. Cell Biol.* **19**, 213–228 (2018).
- 442 2. Frühbeis, C. *et al.* Neurotransmitter-triggered transfer of exosomes mediates oligodendrocyte-  
443 neuron communication. *PLoS Biol.* **11**, e1001604 (2013).
- 444 3. Mukherjee, C. *et al.* Oligodendrocytes provide antioxidant defense function for neurons by  
445 secreting ferritin heavy chain. *Cell Metab.* **32**, 259–272.e10 (2020).
- 446 4. Chaudhuri, A. D. *et al.* TNF $\alpha$  and IL-1 $\beta$  modify the miRNA cargo of astrocyte shed extracellular  
447 vesicles to regulate neurotrophic signaling in neurons. *Cell Death Dis.* **9**, 363 (2018).
- 448 5. Men, Y. *et al.* Exosome reporter mice reveal the involvement of exosomes in mediating neuron  
449 to astroglia communication in the CNS. *Nat. Commun.* **10**, 4136 (2019).
- 450 6. Bahrini, I., Song, J., Diez, D. & Hanayama, R. Neuronal exosomes facilitate synaptic pruning by  
451 up-regulating complement factors in microglia. *Sci. Rep.* **5**, 7989 (2015).
- 452 7. Glebov, K. *et al.* Serotonin stimulates secretion of exosomes from microglia cells. *Glia* **63**, 626–  
453 634 (2015).
- 454 8. Prada, I. *et al.* Glia-to-neuron transfer of miRNAs via extracellular vesicles: a new mechanism  
455 underlying inflammation-induced synaptic alterations. *Acta Neuropathol.* **135**, 529–550 (2018).
- 456 9. Xu, B. *et al.* Neurons secrete miR-132-containing exosomes to regulate brain vascular integrity.  
457 *Cell Res.* **27**, 882–897 (2017).
- 458 10. Wang, Y. *et al.* The release and trans-synaptic transmission of Tau via exosomes. *Mol.*  
459 *Neurodegener.* **12**, 5 (2017).
- 460 11. Asai, H. *et al.* Depletion of microglia and inhibition of exosome synthesis halt tau propagation.  
461 *Nat. Neurosci.* **18**, 1584–1593 (2015).

- 462 12. Wang, B. & Han, S. Exosome-associated tau exacerbates brain functional impairments induced  
463 by traumatic brain injury in mice. *Mol. Cell. Neurosci.* **88**, 158–166 (2018).
- 464 13. Sardar Sinha, M. *et al.* Alzheimer’s disease pathology propagation by exosomes containing toxic  
465 amyloid-beta oligomers. *Acta Neuropathol.* **136**, 41–56 (2018).
- 466 14. Lim, C. Z. J. *et al.* Subtyping of circulating exosome-bound amyloid  $\beta$  reflects brain plaque  
467 deposition. *Nat. Commun.* **10**, 1144 (2019).
- 468 15. Stuenkel, A. *et al.* Induction of  $\alpha$ -synuclein aggregate formation by CSF exosomes from patients  
469 with Parkinson’s disease and dementia with Lewy bodies. *Brain* **139**, 481–494 (2016).
- 470 16. Xia, Y. *et al.* Microglia as modulators of exosomal alpha-synuclein transmission. *Cell Death Dis.*  
471 **10**, 174 (2019).
- 472 17. Sharma, P. *et al.* Exosomes regulate neurogenesis and circuit assembly. *Proc. Natl. Acad. Sci.*  
473 *USA* **116**, 16086–16094 (2019).
- 474 18. Lee, S. H. *et al.* Reciprocal control of excitatory synapse numbers by Wnt and Wnt inhibitor PRR7  
475 secreted on exosomes. *Nat. Commun.* **9**, 3434 (2018).
- 476 19. Vilcaes, A. A., Chanaday, N. L. & Kavalali, E. T. Interneuronal exchange and functional integration  
477 of synaptobrevin via extracellular vesicles. *Neuron* **109**, 971–983.e5 (2021).
- 478 20. Jeppesen, D. K. *et al.* Reassessment of exosome composition. *Cell* **177**, 428–445.e18 (2019).
- 479 21. Mathieu, M., Martin-Jaular, L., Lavieu, G. & Théry, C. Specificities of secretion and uptake of  
480 exosomes and other extracellular vesicles for cell-to-cell communication. *Nat. Cell Biol.* **21**, 9–17  
481 (2019).
- 482 22. Valadi, H. *et al.* Exosome-mediated transfer of mRNAs and microRNAs is a novel mechanism of  
483 genetic exchange between cells. *Nat. Cell Biol.* **9**, 654–659 (2007).
- 484 23. Weiss, K., Antoniou, A. & Schratt, G. Non-coding mechanisms of local mRNA translation in  
485 neuronal dendrites. *Eur. J. Cell Biol.* **94**, 363–367 (2015).
- 486 24. Rajman, M. & Schratt, G. MicroRNAs in neural development: from master regulators to fine-  
487 tuners. *Development* **144**, 2310–2322 (2017).
- 488 25. Olde Loohuis, N. F. M. *et al.* MicroRNA networks direct neuronal development and plasticity.  
489 *Cell Mol. Life Sci.* **69**, 89–102 (2012).
- 490 26. Goldie, B. J. *et al.* Activity-associated miRNA are packaged in Map1b-enriched exosomes  
491 released from depolarized neurons. *Nucleic Acids Res.* **42**, 9195–9208 (2014).
- 492 27. Li, H., Wu, C., Aramayo, R., Sachs, M. S. & Harlow, M. L. Synaptic vesicles contain small  
493 ribonucleic acids (sRNAs) including transfer RNA fragments (trfRNA) and microRNAs (miRNA).  
494 *Sci. Rep.* **5**, 14918 (2015).
- 495 28. Das, S. & Halushka, M. K. Extracellular vesicle microRNA transfer in cardiovascular disease.  
496 *Cardiovasc Pathol* **24**, 199–206 (2015).

- 497 29. Chen, J., Hu, C. & Pan, P. Extracellular vesicle microRNA transfer in lung diseases. *Front. Physiol.*  
498 **8**, 1028 (2017).
- 499 30. Balusu, S. *et al.* Identification of a novel mechanism of blood-brain communication during  
500 peripheral inflammation via choroid plexus-derived extracellular vesicles. *EMBO Mol. Med.* **8**,  
501 1162–1183 (2016).
- 502 31. Leal, G., Afonso, P. M., Salazar, I. L. & Duarte, C. B. Regulation of hippocampal synaptic plasticity  
503 by BDNF. *Brain Res.* **1621**, 82–101 (2015).
- 504 32. Aakalu, G., Smith, W. B., Nguyen, N., Jiang, C. & Schuman, E. M. Dynamic visualization of local  
505 protein synthesis in hippocampal neurons. *Neuron* **30**, 489–502 (2001).
- 506 33. Huang, Y.-W. A., Ruiz, C. R., Eyler, E. C. H., Lin, K. & Meffert, M. K. Dual regulation of miRNA  
507 biogenesis generates target specificity in neurotrophin-induced protein synthesis. *Cell* **148**, 933–  
508 946 (2012).
- 509 34. Antoniou, A. *et al.* The dynamic recruitment of TRBP to neuronal membranes mediates  
510 dendritogenesis during development. *EMBO Rep.* **19**, (2018).
- 511 35. Vo, N. *et al.* A cAMP-response element binding protein-induced microRNA regulates neuronal  
512 morphogenesis. *Proc. Natl. Acad. Sci. USA* **102**, 16426–16431 (2005).
- 513 36. Schratt, G. M. *et al.* A brain-specific microRNA regulates dendritic spine development. *Nature*  
514 **439**, 283–289 (2006).
- 515 37. Gao, J. *et al.* A novel pathway regulates memory and plasticity via SIRT1 and miR-134. *Nature*  
516 **466**, 1105–1109 (2010).
- 517 38. Fiore, R. *et al.* Mef2-mediated transcription of the miR379-410 cluster regulates activity-  
518 dependent dendritogenesis by fine-tuning Pumilio2 protein levels. *EMBO J.* **28**, 697–710 (2009).
- 519 39. Novkovic, T., Mittmann, T. & Manahan-Vaughan, D. BDNF contributes to the facilitation of  
520 hippocampal synaptic plasticity and learning enabled by environmental enrichment.  
521 *Hippocampus* **25**, 1–15 (2015).
- 522 40. Leal, G., Bramham, C. R. & Duarte, C. B. BDNF and hippocampal synaptic plasticity. *Vitam Horm*  
523 **104**, 153–195 (2017).
- 524 41. Heldt, S. A., Stanek, L., Chhatwal, J. P. & Ressler, K. J. Hippocampus-specific deletion of BDNF in  
525 adult mice impairs spatial memory and extinction of aversive memories. *Mol. Psychiatry* **12**,  
526 656–670 (2007).
- 527 42. Ying, S.-W. *et al.* Brain-derived neurotrophic factor induces long-term potentiation in intact  
528 adult hippocampus: requirement for ERK activation coupled to CREB and upregulation of Arc  
529 synthesis. *J. Neurosci.* **22**, 1532–1540 (2002).
- 530 43. Collot, M. *et al.* Membright: A family of fluorescent membrane probes for advanced cellular  
531 imaging and neuroscience. *Cell Chem. Biol.* **26**, 600–614.e7 (2019).



- 532 44. Hyenne, V., Lefebvre, O. & Goetz, J. G. Going live with tumor exosomes and microvesicles. *Cell*  
533 *Adh Migr* **11**, 173–186 (2017).
- 534 45. Joshi, B. S., de Beer, M. A., Giepmans, B. N. G. & Zuhorn, I. S. Endocytosis of Extracellular  
535 Vesicles and Release of Their Cargo from Endosomes. *ACS Nano* **14**, 4444–4455 (2020).
- 536 46. Bonsergent, E. *et al.* Quantitative characterization of extracellular vesicle uptake and content  
537 delivery within mammalian cells. *Nat. Commun.* **12**, 1864 (2021).
- 538 47. Catalano, M. & O’Driscoll, L. Inhibiting extracellular vesicles formation and release: a review of  
539 EV inhibitors. *J Extracell Vesicles* **9**, 1703244 (2020).
- 540 48. Chevillet, J. R. *et al.* Quantitative and stoichiometric analysis of the microRNA content of  
541 exosomes. *Proc. Natl. Acad. Sci. USA* **111**, 14888–14893 (2014).
- 542 49. Cherone, J. M., Jorgji, V. & Burge, C. B. Cotargeting among microRNAs in the brain. *Genome Res.*  
543 **29**, 1791–1804 (2019).
- 544 50. Santos, M. C. T. *et al.* miR-124, -128, and -137 Orchestrate Neural Differentiation by Acting on  
545 Overlapping Gene Sets Containing a Highly Connected Transcription Factor Network. *Stem Cells*  
546 **34**, 220–232 (2016).
- 547 51. Pons-Espinal, M. *et al.* Synergic Functions of miRNAs Determine Neuronal Fate of Adult Neural  
548 Stem Cells. *Stem Cell Rep.* **8**, 1046–1061 (2017).
- 549 52. Aten, S., Hansen, K. F., Hoyt, K. R. & Obrietan, K. The miR-132/212 locus: a complex regulator of  
550 neuronal plasticity, gene expression and cognition. *RNA Dis.* **3**, (2016).
- 551 53. Rocchi, A. *et al.* Neurite-Enriched MicroRNA-218 Stimulates Translation of the GluA2 Subunit  
552 and Increases Excitatory Synaptic Strength. *Mol. Neurobiol.* **56**, 5701–5714 (2019).
- 553 54. Torres-Berrío, A. *et al.* MiR-218: a molecular switch and potential biomarker of susceptibility to  
554 stress. *Mol. Psychiatry* **25**, 951–964 (2020).
- 555 55. Cheng, L. *et al.* Prognostic serum miRNA biomarkers associated with Alzheimer’s disease shows  
556 concordance with neuropsychological and neuroimaging assessment. *Mol. Psychiatry* **20**, 1188–  
557 1196 (2015).
- 558 56. Jain, G. *et al.* A combined miRNA-piRNA signature to detect Alzheimer’s disease. *Transl.*  
559 *Psychiatry* **9**, 250 (2019).
- 560 57. Tannetta, D., Dragovic, R., Alyahyaei, Z. & Southcombe, J. Extracellular vesicles and  
561 reproduction-promotion of successful pregnancy. *Cell Mol Immunol* **11**, 548–563 (2014).
- 562 58. Morad, G. *et al.* Tumor-Derived Extracellular Vesicles Breach the Intact Blood-Brain Barrier via  
563 Transcytosis. *ACS Nano* **13**, 13853–13865 (2019).
- 564 59. Korkut, C. *et al.* Regulation of postsynaptic retrograde signaling by presynaptic exosome release.  
565 *Neuron* **77**, 1039–1046 (2013).
- 566 60. Pastuzyn, E. D. *et al.* The Neuronal Gene Arc Encodes a Repurposed Retrotransposon Gag  
567 Protein that Mediates Intercellular RNA Transfer. *Cell* **172**, 275–288.e18 (2018).

568 61. Horch, H. W. & Katz, L. C. BDNF release from single cells elicits local dendritic growth in nearby  
569 neurons. *Nat. Neurosci.* **5**, 1177–1184 (2002).

## 570 **Supplementary Files**

571 Supplementary Methods

572 • List of Materials Tables S1&S2

573 • Supplementary Methods

574 Supplementary Data

575 • Supplementary Figures S1-S6

576 • Supplementary Data Table S1

## 577 **Acknowledgements**

578 We thank Ms Julia Lindlar for technical help with EV isolation. We are grateful to Dr. Melania Capasso  
579 and Prof. Donato Di Monte for kindly sharing antibodies. Prof. Susanne Schoch and Prof. Gerhard  
580 Schrott generously provided DNA plasmids. We thank the DZNE Light Microscope core facility (LMF)  
581 for providing support and instrumentation for light microscopy experiments and the Microscopy Core  
582 Facility of the Medical Faculty at the University of Bonn for their support in scanning transmission  
583 electron microscopy, funded by the German Research Foundation (Deutsche Forschungsgemeinschaft,  
584 DFG – Projectnumber 388171357). AA was funded via the BONFOR research foundation of the Bonn  
585 Medical Faculty for implementation of this project.

## 586 **Competing Interests**

587 The authors declare no conflict of interest.

## 588 **Author declaration**

589 All authors have seen and approved this manuscript and confirm that it has not been accepted for  
590 publication elsewhere.

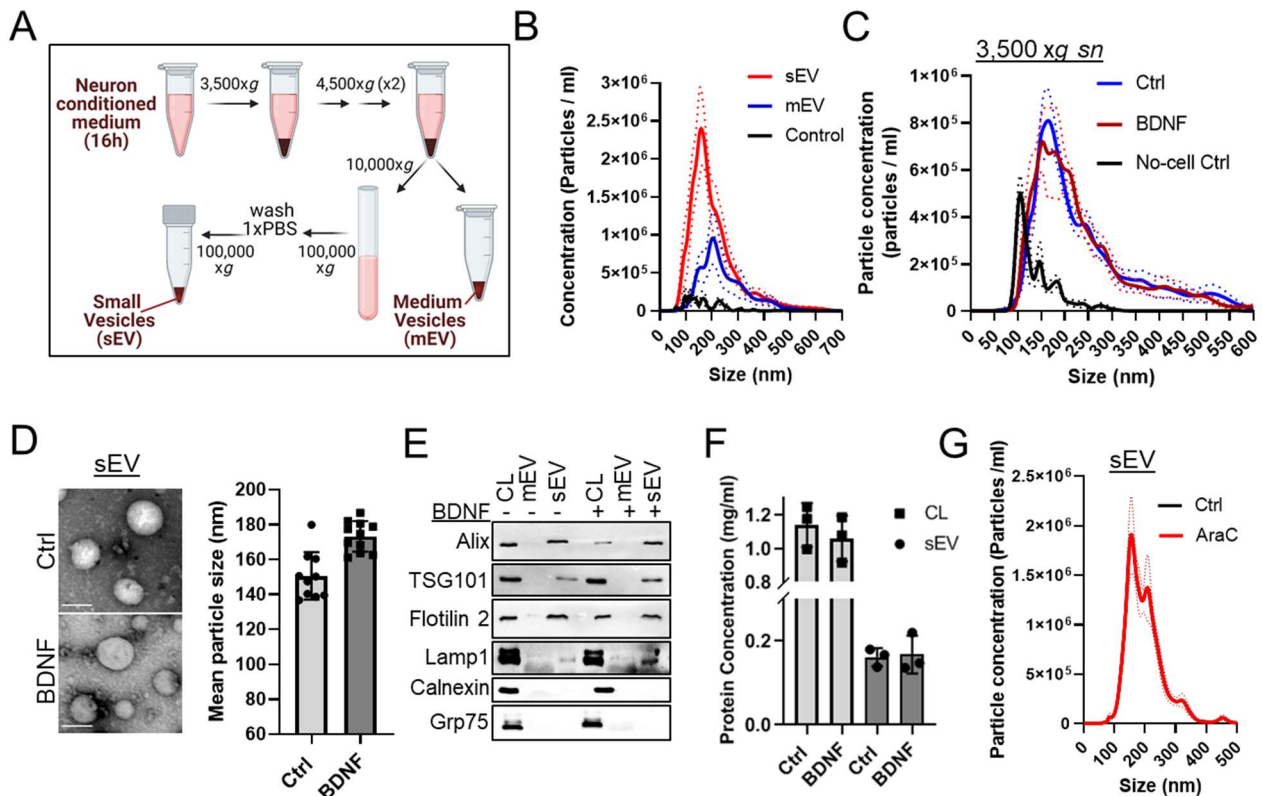

591 **Figure 1: BDNF does not affect EV secretion**

592 **A)** Diagram depicting isolation protocol for small and medium-sized EVs (sEV, mEV). Figure was  
593 created in biorender.com.

594 **B)** Size distribution of sEVs and mEVs derived from primary cortical neurons, measured in  
595 nanoparticle tracking analysis (NTA). The buffer used to dilute the EV pellets was used as control; n=3-  
596 4, error bars represent standard error of the mean (dashed line).

597 **C)** BDNF treatment does not affect the yield of extracellular particles. Cleared cell culture  
598 supernatants (3,500 xg sn) from ctrl or BDNF-treated cortical neurons (7DIV) and non-conditioned  
599 culture medium ('no-cell ctrl') were processed in NTA. Traces and dotted lines represent the mean and  
600 standard error from four independent experiments, n=4.

601 **D)** Scanning transmission electron microscopy (STEM) images of sEVs obtained from Ctrl or BDNF-  
602 treated neurons; scale bars are 100nm. (Right) Mean particle size of sEVs was calculated in  
603 approximately 10 STEM micrographs for each condition (dimensions 1,14  $\mu\text{m}^2$ ).

604 **E)** BDNF does not change the relative abundance of EV markers. Cell lysates (CL) and respective sEV  
605 and mEVs were processed in western blotting. The endoplasmic reticulum protein calnexin and golgi  
606 marker grp75 were used as negative controls.

607 **F)** BDNF does not change total protein concentration in cortical neuron lysates (CL) or corresponding  
608 sEVs isolated by UC; n=3.

609 **G)** Depletion of glia in neuronal cultures does not affect sEV yield. Size distribution was measured in  
610 NTA. Dotted lines represent standard error of the mean from 5 measurements.

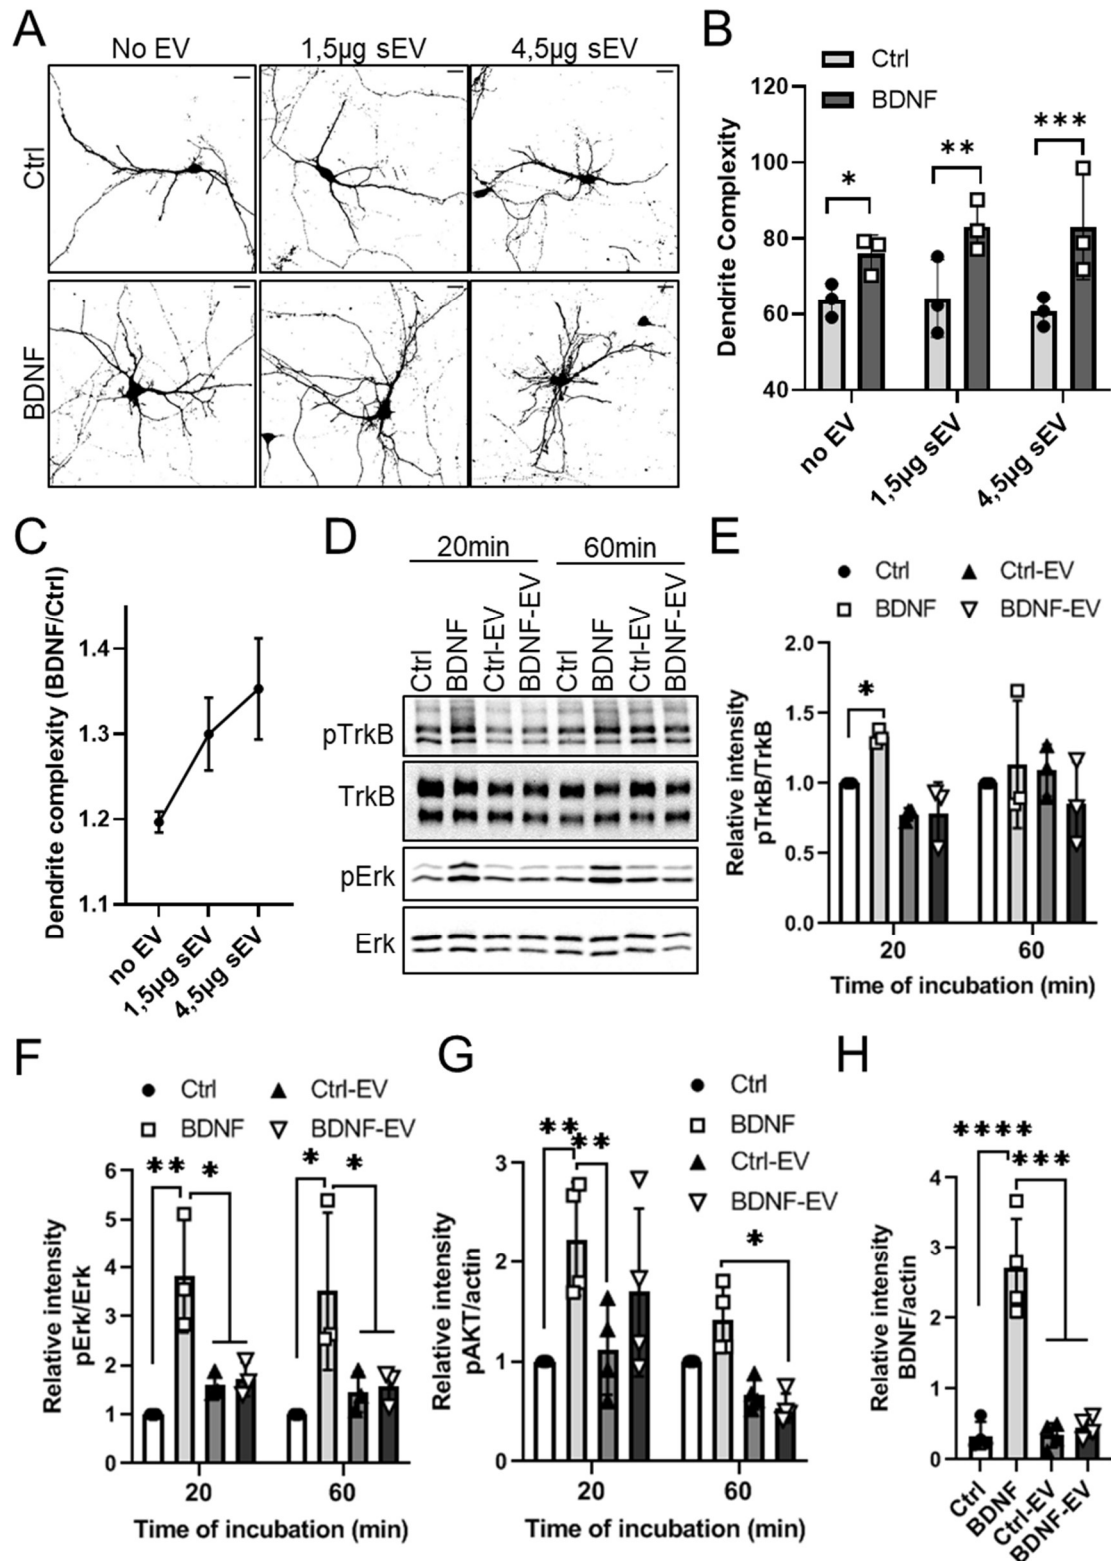

611

612 **Figure 2: BDNF-induced sEVs increase dendrite complexity in the absence of TrkB activation**  
613 **and downstream signaling**

614 **A)** BDNF-EVs increase dendrite complexity. Hippocampal neurons transfected with dsRed  
615 were treated with control vehicle (Ctrl) or BDNF (100ng/ml, 20 min) ('No EV'), and sEVs derived  
616 from Ctrl- or BDNF-treated cortical neurons and fixed three days later. Shown are thresholded  
617 images of dsRed-expressing neurons. EVs were applied at 1,5 or 4,5 µg total protein; scale bars  
618 20µm.

- 619 **B)** Dendrite complexity of neurons treated as in **A** was calculated in Sholl analysis; n=3, 2way  
620 ANOVA, \* $p=0.04$ ; \*\* $p=0.006$ ; \*\*\* $p=0.002$ .
- 621 **C)** BDNF-dependent fold changes in dendrite complexity. Dendrite complexity was  
622 normalized to respective control treatments in each independent experiment; n=4, error bars  
623 represent standard error of the mean.
- 624 **D)** Western blot of BDNF-treated or EV-recipient hippocampal neurons. Recipient cells were  
625 lysed 20 or 60 min after treatment and lysates were immunoblotted with antibodies against  
626 total or phosphorylated (p) TrkB and ERK.
- 627 **E)** BDNF-EVs do not stimulate TrkB phosphorylation. Relative intensities of phosphorylated  
628 or total TrkB as depicted in **A** were quantified and normalized to control treatment in each  
629 independent experiment; n=3, \* $p=0.04$  in 2way ANOVA.
- 630 **F)** BDNF-EVs do not stimulate ERK phosphorylation. Blots were quantified as in **B**; n=3, 2way  
631 ANOVA, \* $p<0.03$ , \*\* $p<0.01$ .
- 632 **G)** BDNF-EVs do not stimulate AKT phosphorylation. Relative intensity of phosphorylated  
633 AKT (pAKT) was normalized to actin and control vehicle; n=3, 2way ANOVA, \*\* $p<0.005$ ,  
634 \* $p=0.03$ .
- 635 **H)** EVs do not increase mature BDNF levels. Recipient neurons were lysed after 3 hours of  
636 treatment and processed in immunoblotting. Relative intensity of mature BDNF was  
637 normalized to actin; n=3, 1way ANOVA, \*\*\* $p<0.0001$ .

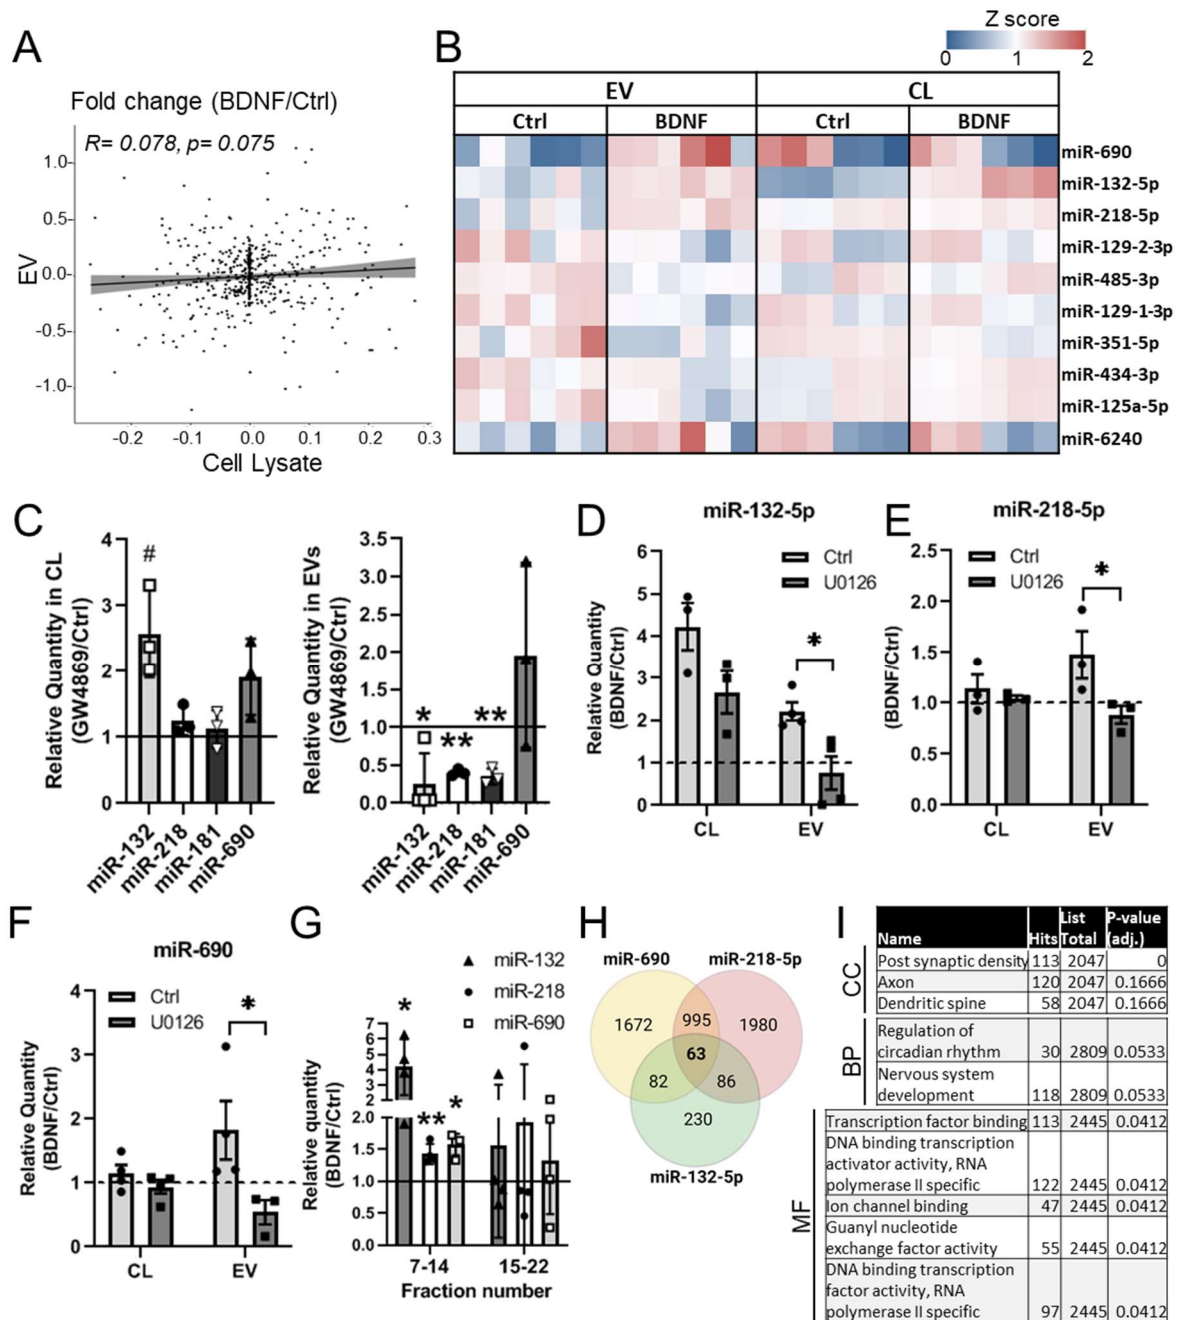

638

639 **Figure 3: BDNF regulates the sorting of EV-miRNAs**

640 **A)** BDNF-induced changes in miRNA abundance in EVs and cell lysates do not correlate.  
 641 Depicted are Pearson's correlation values.

642 **B)** Heatmap depicting the levels of the top 10 regulated EV-miRNAs in decreasing order of  
 643 significance and corresponding changes in cell lysates (CL); n=6. Values were normalized to  
 644 the base mean for each miRNA.

645 **C)** Inhibition of exosome secretion reduces miR-218, miR-132 and miR-181 abundance in  
 646 sEVs. Relative miRNA quantity in control or GW4869-treated cell lysates (*left*) and EVs (*right*)  
 647 was quantified in rt-qPCR and normalized to RNA and control treatment; n=3-4, \* $p=0.035$ ,  
 648 \*\* $p<0.01$ , Student's t-test (heteroscedastic).

649 **D-F)** Validation of up-regulated EV-miRNAs by rt-qPCR. Treatment of EV donors with the MAPK  
 650 inhibitor U0126 blocked the BDNF-induced increase in EV miRNAs. Relative values were

651 normalized to RNA concentration and miR-181a reference miRNA; n= 3-4, \* $p < 0.05$ , 2way  
652 ANOVA.

653 **G)** BDNF upregulates miR-132, miR-218 and miR-690 in EV-enriched fractions isolated by  
654 size-exclusion chromatography. RNA abundance was normalized to control treatment in each  
655 independent experiment; n=4, \* $p < 0.04$ ; \*\* $p = 0.006$ , Student's t-test (heteroscedastic).

656 **H)** Venn diagram depicting the number of predicted targets for up-regulated EV miRNA.  
657 Prediction was performed using miRWalk.

658 **I)** Gene set enrichment analysis of targets common to up-regulated EV-miRNAs, using target  
659 mining (miRWalk). Shown P-values are adjusted for multiple comparisons, CC; cellular  
660 component, BP; biological pathway, MF; molecular function.

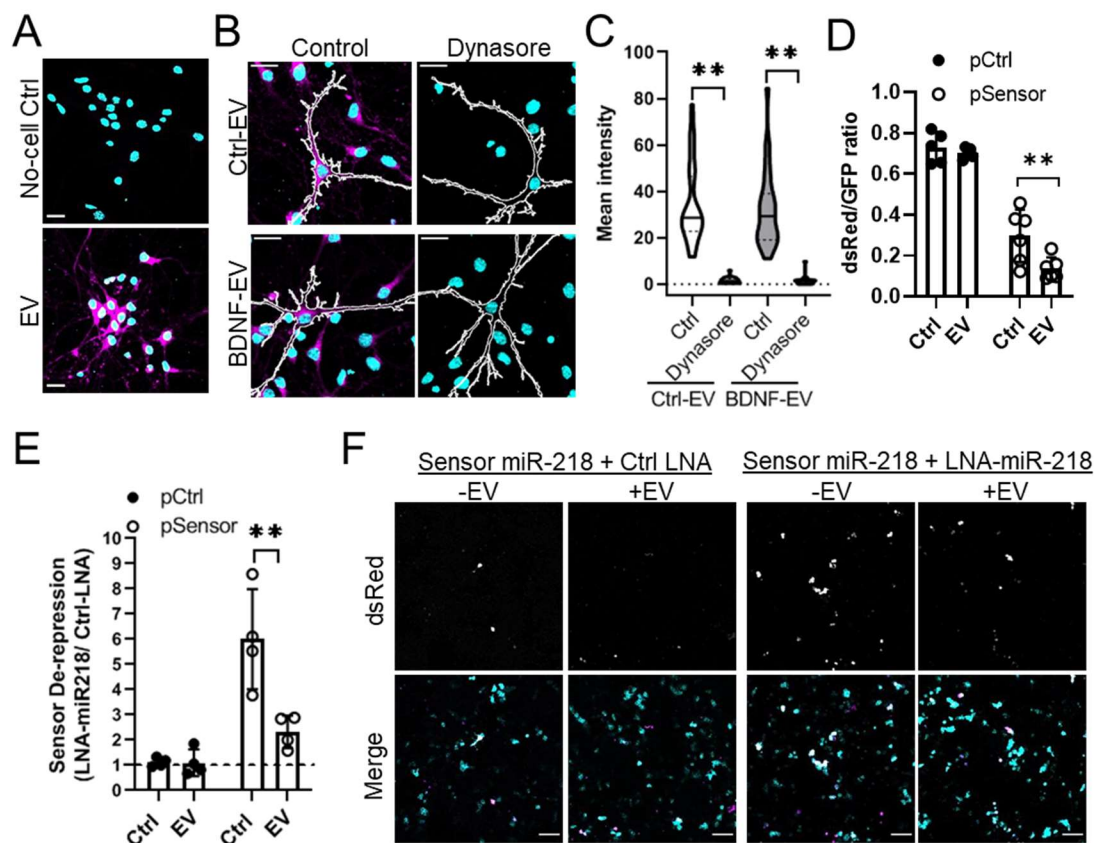

661 **Figure 4: EVs and EV-miRNAs are taken up by neurons**

663 **A)** Lipilight-560 specifically labels EVs. EVs and non-conditioned medium (No-cell Ctrl)  
664 fractions processed in parallel were labeled with lipilight-560 and added to neurons for 75  
665 minutes.

666 **B)** Dynasore blocks the uptake of neuronal sEVs. Hippocampal neurons pre-treated with  
667 control vehicle or Dynasore were incubated with lipilight-560-labelled sEVs for 30 minutes.  
668 White traces mark the outlines of membrane-GFP (mGFP)-expressing hippocampal neurons.  
669 Lipilight-560; magenta, DAPI; cyan, scale bars 20 $\mu$ m.

670 **C)** Lipilight fluorescence intensity was quantified in the somatodendritic compartment of  
671 recipient neurons treated as in **E**. Shown is the distribution, median (black lines), upper and  
672 lower quartiles (dashed lines) from 10-15 neurons per experimental condition; n=3, 2way  
673 ANOVA, \*\* $p < 0.02$ .

674 **D)** N2A cell-derived sEVs increase the translational repression of a dual fluorescence  
 675 reporter for miR-218 activity. Recipient N2A cells were transfected with control (pControl) and  
 676 miR-218 reporter plasmid (pSensor), containing two miR-218 binding sites at the 3'UTR of  
 677 dsRed and GFP as internal control. The number of dsRed-expressing and GFP-positive cells was  
 678 counted approximately 20 hours following addition of EVs, n=5-6; \* $p=0.002$ , 2way ANOVA.  
 679 **E)** N2A sEV supplementation reverses miR-218 sensor de-repression following inhibition of  
 680 intracellular miR-218. N2A cells were co-transfected with sensor plasmids as in **D** and either  
 681 Ctrl-LNA or LNA-miR-218. Sensor repression was normalized to Ctrl-LNA in each experiment;  
 682 n=4, 2way ANOVA, \* $p<0.01$ .  
 683 **F)** Representative images of dual fluorescence sensor assay as in **E**. GFP; cyan, dsRed;  
 684 magenta, scale bar; 100 $\mu$ m.

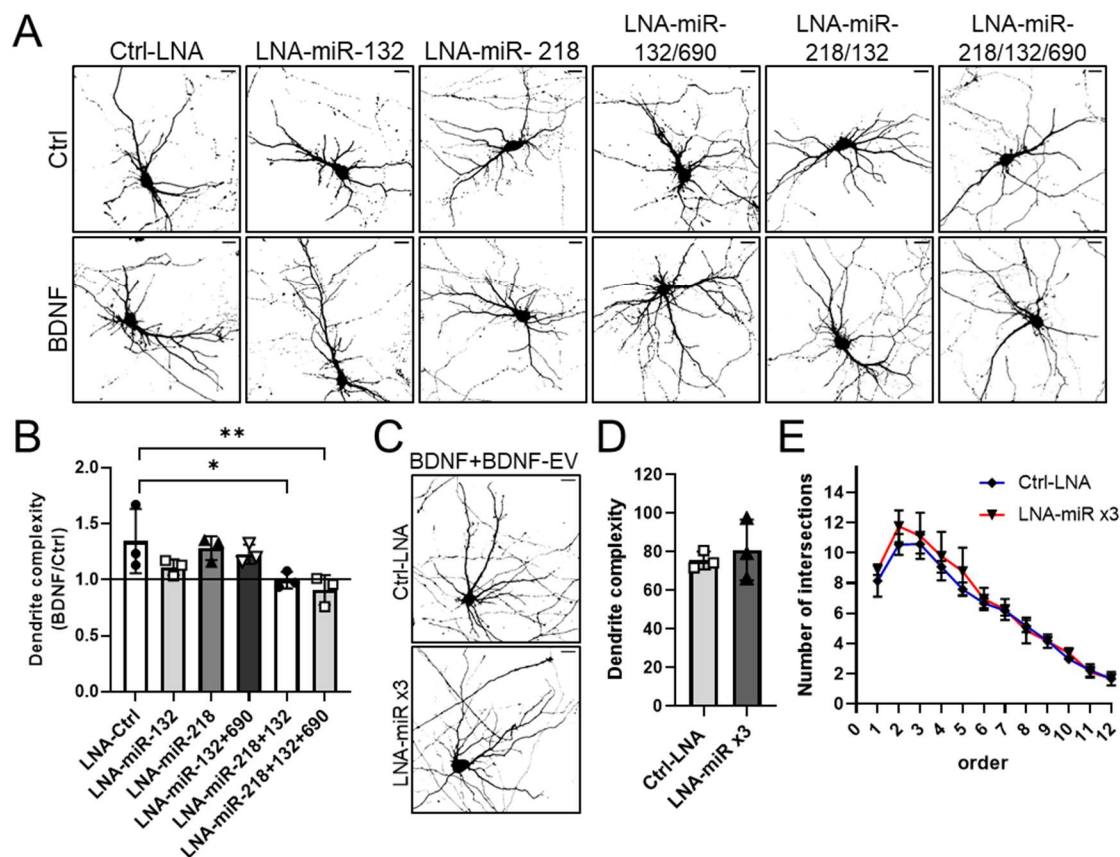

685

686 **Figure 5: BDNF-regulated EV-miRNAs regulate dendritogenesis**

687 **A)** Combined inhibition of miR-128-5p, miR-132-5p and miR-690 blocks BDNF-dependent  
 688 dendritogenesis. Hippocampal neurons were transfected with dsRed and control LNA (30nM),  
 689 or LNAs against respective miRNAs (15nM each LNA or 10nM for co-transfection of three  
 690 LNAs). Neurons were treated with BDNF (100ng/ml, 20min) and fixed three days later. Shown  
 691 are thresholded images based on dsRed fluorescence, scale bars; 20 $\mu$ m.

692 **B)** BDNF-fold changes in dendrite complexity were compared between each condition; n=3;  
 693 1way ANOVA; \*\* $p=0.013$ ; \* $p=0.049$ .

694 **C)** BDNF-EVs block the LNA-induced decrease in BDNF-dependent dendritogenesis.  
 695 Hippocampal neurons were co-transfected with LNAs against miR-128-5p, miR-132-5p and



696 miR-690 ('LNA-miR x3') and treated with BDNF as in **A**. BDNF-EVs were incubated following  
697 BDNF treatment for three days, scale bars; 20 $\mu$ m  
698 **D**) Dendrite complexity of neurons treated as in **C** was quantified in Sholl analysis, n=3.  
699 **E**) Sholl profiles of hippocampal neurons treated as in **C**. Error bars represent standard error,  
700 n=3.

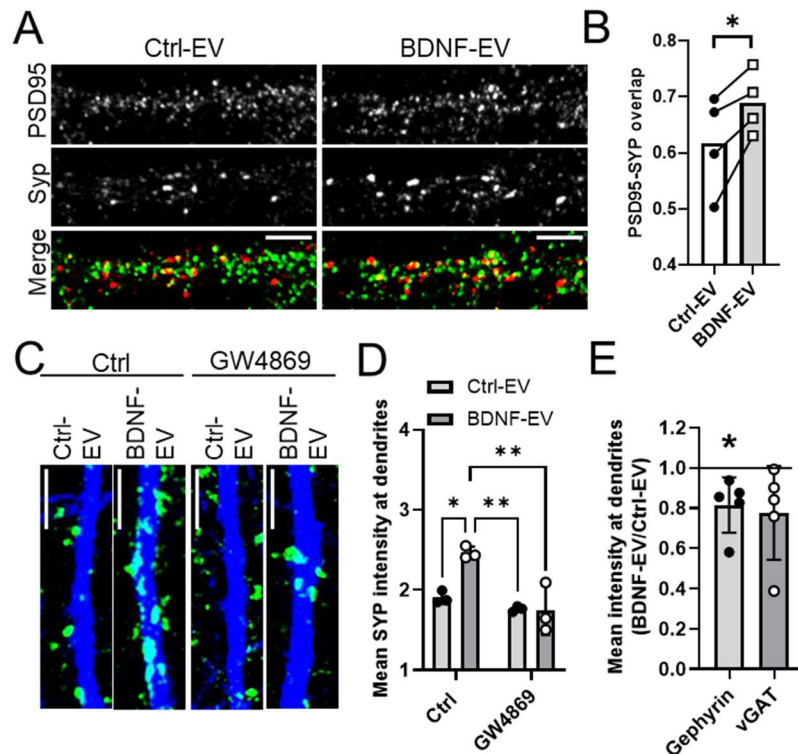

701

### 702 **Figure 6: BDNF-EVs up-regulate Synaptophysin clustering at dendrites**

703 **A**) Representative images of neuronal dendrites from EV-treated neurons. Hippocampal  
704 neurons were treated with Ctrl- or BDNF-EVs for three days and immunostained with  
705 antibodies against PSD95 (green) and synaptophysin (SYP; red). Scale bars are 5 $\mu$ m.

706 **B**) BDNF-EVs increase co-localization between PSD95 and SYP. Mander's overlap co-  
707 efficients were calculated in 20 $\mu$ m-long dendritic segments treated as in **A**, n=4, \* $p$ =0.03,  
708 Student's paired t-test.

709 **C**) BDNF-EVs increase the levels of SYP at neuronal dendrites, which is blocked by GW4869.  
710 Ctrl- or BDNF-EVs were isolated from donor neurons treated with control vehicle or GW4869  
711 and incubated with recipient hippocampal neurons. Recipient neurons were fixed and  
712 immunostained with anti-SYP (green) and anti-MAP2 (blue) antibodies, scale bar; 5 $\mu$ m.

713 **D**) Mean fluorescence intensity of SYP was quantified in MAP2-positive neuronal dendrites  
714 as shown in **C**, n=3, 2way ANOVA, \* $p$ =0.01; \*\* $p$ <0.004.

715 **E**) BDNF-EVs decrease gephyrin intensity in neuronal dendrites. Mean fluorescence intensity  
716 of Gephyrin and vGat was quantified in 20 $\mu$ m-long dendritic segments; n=5, Welch's t-test,  
717 \* $p$ <0.05.

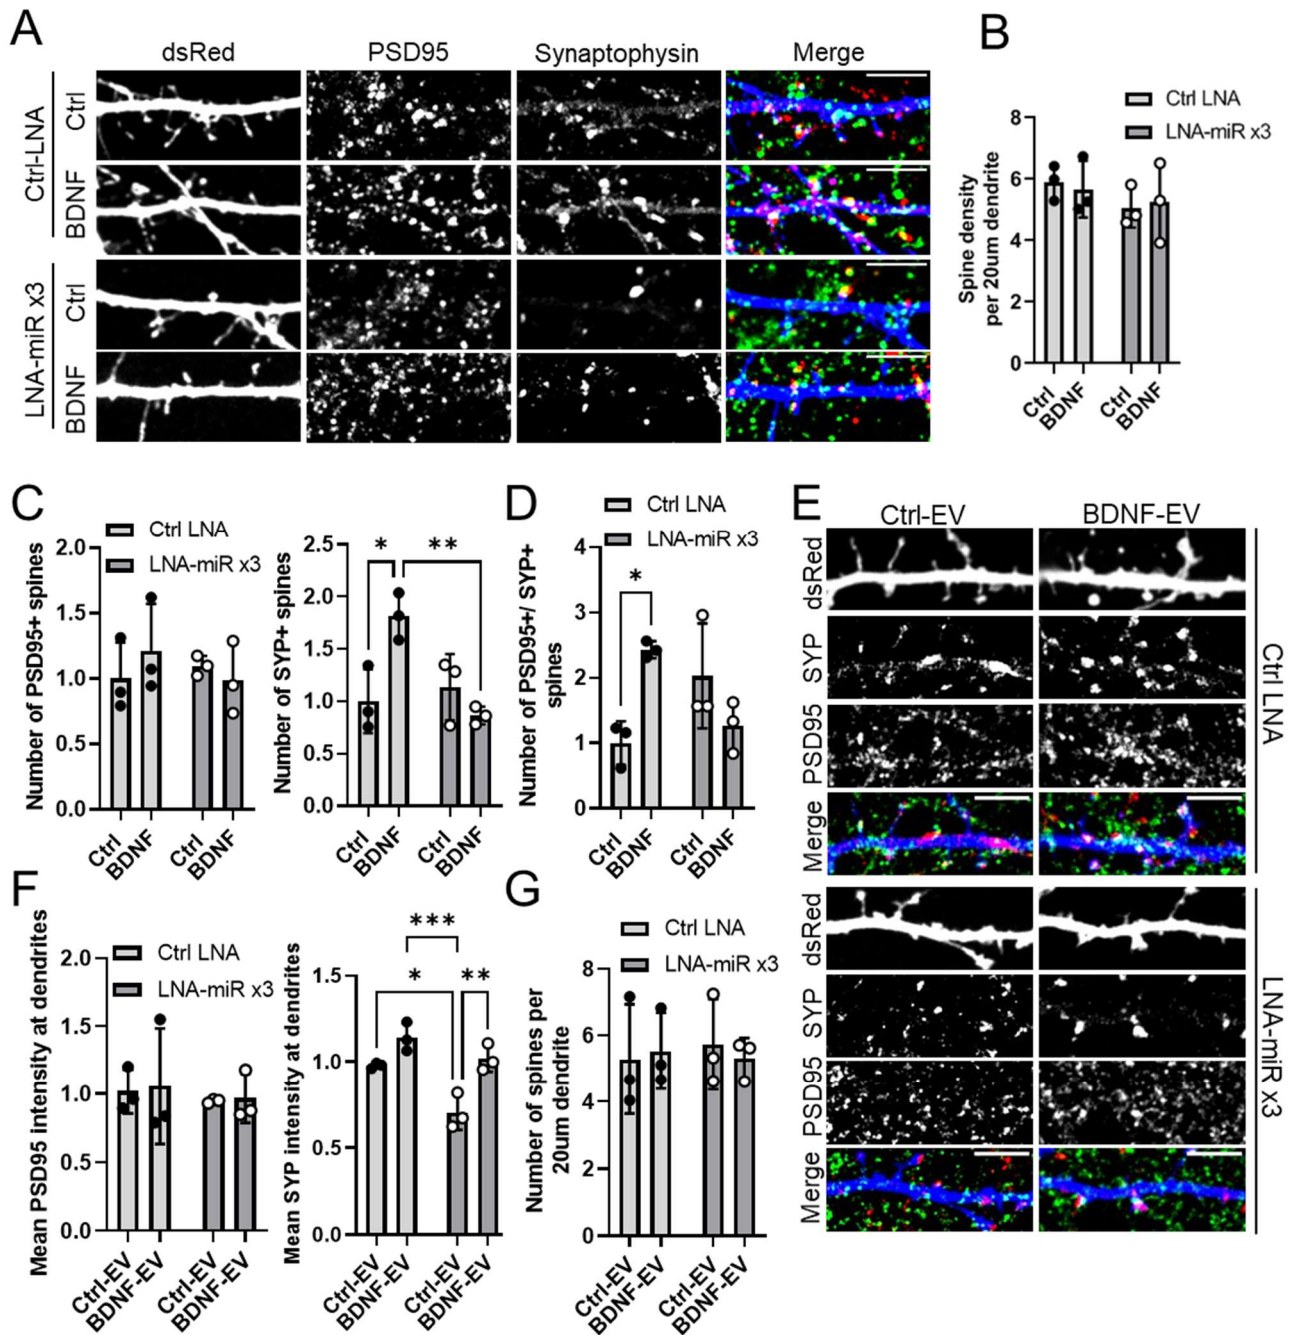

718 **Figure 7: BDNF-EV up-regulation of Syp clustering is regulated via miRNAs miR-218, miR-132**  
 719 **and miR-690**

720 **A)** Combined inhibition of BDNF-regulated EV-miRNAs blocks BDNF-dependent synapse  
 721 maturation. Hippocampal neurons were transfected with either control LNA (30nM) or LNAs  
 722 antisense to miR-218, miR-132 and miR-690 (10nM each, 'LNA-miRx3') and treated with BDNF  
 723 (100ng/ml, 20min). Neurons were fixed three days later and immunostained with antibodies  
 724 against PSD95 (green) and SYP (red); dsRed shown in blue, scale bars; 6µm.

725 **B)** Spine density is constant across conditions. The number of dendritic spines was counted  
 726 in 20µm-long, dsRed-expressing dendrites; n=3.

727 **C)** Inhibition of BDNF-regulated EV miRNAs blocks the BDNF-induced increase in SYP-positive  
 728 spines. The number of spines containing PSD95 (*left*) or SYP (*right*) was counted in 20µm-long

729 dendrites using dsRed as a morphological marker. Values were normalized to control; n=3,  
730 2way ANOVA, \* $p=0.02$ , \*\* $p=0.01$ .

731 **D)** BDNF increases the number of spines containing both PSD95 and SYP, which is blocked by  
732 inhibition miR-218, miR-132 and miR-690, n=3, 2way ANOVA, \* $p=0.04$ .

733 **E)** Hippocampal neurons expressing LNAs as in **A** were treated with BDNF and supplemented  
734 with Ctrl-EV or BDNF-EV. Shown are dsRed-expressing dendrites immunostained as in **A**; scale  
735 bars 5 $\mu$ m.

736 **F)** BDNF-EVs rescue the LNA-induced block in BDNF-mediated SYP clustering. Mean PSD95  
737 (*left*) and SYP (*right*) intensity was quantified in dendrites treated as in **E**, n=3, 2way ANOVA,  
738 \* $p=0.01$ , \*\* $p=0.004$ , \*\*\* $p=0.0005$ .

739 **G)** Spine density is not affected by Ctrl-EV or BDNF-EV in the presence of BDNF and LNAs,  
740 n=3.

741
